# Supplementary material for: Isothiocyanates as Tubulin Polymerization Inhibitors—Synthesis and Structure–Activity Relationship Studies
Source: MDPI journal article supplement (doi:10.3390/ijms241813674), 2023-09-05
Supplement: s1 [file s1]

# Isothiocyanates as Tubulin Polymerization Inhibitors— Synthesis and Structure–Activity Relationship Studies

Renata Grzywa <sup>1</sup>, Mateusz Psurski <sup>2</sup>, Anna Gajda <sup>3</sup>, Tadeusz Gajda <sup>3</sup> and Łukasz Janczewski <sup>3,\*</sup>

<sup>1</sup> Department of Organic and Medicinal Chemistry, Faculty of Chemistry, Wrocław University of Science and Technology, Wybrzeże Wyspiańskiego 27, 50-370 Wrocław, Poland; renata.grzywa@pwr.edu.pl

<sup>2</sup> Department of Experimental Oncology, Hirsfeld Institute of Immunology and Experimental Therapy, Polish Academy of Sciences, 12 Rudolf Weigl St., 53-114 Wrocław, Poland; mateusz.psurski@hirsfeld.pl

<sup>3</sup> Institute of Organic Chemistry, Faculty of Chemistry, Łódź University of Technology, 116 Stefan Żeromski St., 90-924 Łódź, Poland; anna.gajda@p.lodz.pl (A.G.); tadeusz.gajda@p.lodz.pl (T.G.)

\* Correspondence: lukasz.janczewski@p.lodz.pl; Tel.: +48-(42)631-31-45

## Table of contents:

|                                             |     |
|---------------------------------------------|-----|
| 1. General information                      | S2  |
| 2. Synthetic procedure for ITCs <b>1-16</b> | S2  |
| 3. Table S1                                 | S9  |
| 4. References                               | S14 |

## 1. General information

NMR spectra were measured on a Bruker AC-TM DRX 300 and Bruker Avance II Plus 700 MHz (Bruker Corporation, Billerica, MA, USA) spectrometer in a CDCl<sub>3</sub> solution. Chemical shift ( $\delta$ ) are reported in ppm and coupling constants ( $J$ ) in Hz. <sup>1</sup>H and <sup>13</sup>C NMR spectra were referenced according to the residual peak of the solvent based on literature data. Chemical shift ( $\delta$ ) were reported in ppm and coupling constants ( $J$ ) in Hz. <sup>13</sup>C NMR spectra were proton-decoupled. A Bruker MicroTOF-Q II spectrometer (Bruker Daltonics, Germany) equipped with an Apollo II electrospray ionization source with an ion funnel was used for the acquisition of the high-resolution electrospray ionization (ESI) mass spectra. Flash chromatography was performed using a glass column packed with Baker silica gel (30–60 m). For TLC, silica gel with a 254 nm indicator on Al foils (Sigma–Aldrich, St. Louis, MO, USA) was used. All reagents and solvents were purchased from Sigma-Aldrich (Poland) and used as obtained.

## 2. Synthetic procedure for ITCs 1-16

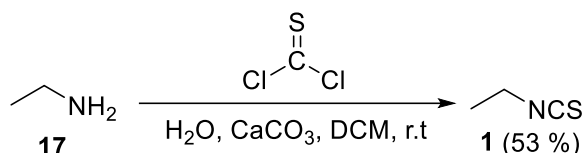

**Figure S1.** Synthesis of ethyl isothiocyanate (**1**) using thiophosgene.

ITC **1** was synthesized from ethylamine (0.13 mL, 2 mmol) (**17**) in the presence of thiophosgene (0.31 mL, 4 mmol) in a two-phase system (CaCO<sub>3</sub> (1.2 g, 12 mmol) in 4 mL of H<sub>2</sub>O and DCM (4 mL)) during 2 h at r.t. The reaction mixture was extracted by DCM (3 × 10 mL), washed with brine (5 mL) and dried over anhydrous MgSO<sub>4</sub>. Final ITC **1** was isolated after evaporation of solvent in good yield (53 %) (**Figure S1**) [1]. Known compound.

*Ethyl isothiocyanate (1)*. Colorless oil. Yield 53 % (0.092 g, 1.06 mmol). <sup>1</sup>H NMR (400 MHz, CDCl<sub>3</sub>):  $\delta$  3.58 (*q*,  $J$ = 7.1 Hz, 2 H, CH<sub>2</sub>), 1.40 (*t*,  $J$ = 7.1 Hz, 3 H, CH<sub>3</sub>). EI-MS:  $m/z$  [M]<sup>+</sup> calcd for C<sub>3</sub>H<sub>5</sub>NS<sup>+</sup> 87.14, found 87.00. The analytical data are in agreement with those reported previously in the literature [2].

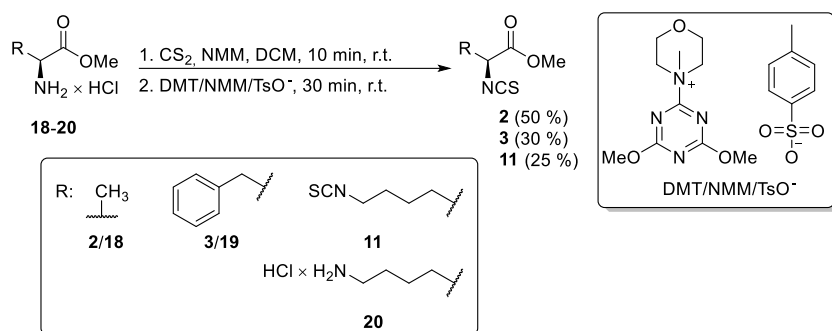

**Figure S2.** Synthesis of isothiocyanate derivatives of amino acids methyl esters **2**, **3** and **11** using DMT/MMM/TsO<sup>-</sup> as desulfurating reagent.

Isothiocyanate derivatives of amino acids methyl esters **2**, **3** and **11** were synthesized in one-pot, two step procedure using 4-(4,6-dimethoxy-1,3,5-triazin-2-yl)-4-methylmorpholinium toluene-4-sulfonate (DMT/MMM/TsO<sup>-</sup>) as a desulfurating agent. In the first step hydrochloride **18-20** (2 mmol), carbon disulfide ( $\text{CS}_2$ ) (0.36 mL, 6 mmol for **18-19** or 0.72 mL, 12 mmol for **20**) and *N*-methylmorpholine (NMM) (0.66 mL, 6 mmol for **18-19** or 1.32 mL, 12 mmol for **20**) were stirred in DCM (5 mL) at r.t. for 10 min, after which DMT/MMM/TsO<sup>-</sup> (0.828 g, 2 mmol for **18-19** or 1.656 g, 4 mmol for **20**) was added and stirring was continued for 30 min at r.t. Next, the reaction mixture was diluted with DCM (50 mL) and washed with  $\text{H}_2\text{O}$  (5 mL), 1 N HCl (2 × 5 mL),  $\text{H}_2\text{O}$  (5 mL), and dried over anhydrous  $\text{MgSO}_4$ . Final isothiocyanates **2**, **3** and **11** were isolated after flash chromatography (hexane: EtOAc 20: 1) in low yields (25-50 %) (**Figure S2**) [3]. Known compounds.

*(S)*-Methyl 2-Isothiocyanatopropanoate (**2**). Colorless oil. Yield 50 % (0.145 g, 1 mmol).  $^1\text{H}$  NMR (700 MHz,  $\text{CDCl}_3$ ):  $\delta$  = 4.35 (*q*,  $J$  = 7.1 Hz, 1 H,  $\text{CHNCS}$ ), 3.81 (*s*, 3 H,  $\text{CH}_3\text{O}$ ), 1.60 (*d*,  $J$  = 7.1 Hz, 3 H,  $\text{CH}_3$ ). HR-MS:  $m/z$  [ $\text{M}$ ]<sup>+</sup> calcd for  $\text{C}_5\text{H}_7\text{NO}_2\text{S}^+$  145.0197, found 145.0204.

*(S)*-Methyl 2-isothiocyanato-3-phenylpropanoate (**3**). Colorless oil. Yield 30 % (0.132 g, 0.6 mmol).  $^1\text{H}$  NMR (700 MHz,  $\text{CDCl}_3$ ):  $\delta$  = 7.36–7.34 (*m*, 2 H,  $\text{CH}_{\text{Ar}}$ ), 7.31–7.29 (*m*, 1 H,  $\text{CH}_{\text{Ar}}$ ), 7.23–7.22 (*m*, 2 H,  $\text{CH}_{\text{Ar}}$ ), 4.48 (*dd*,  $J_{\text{HaH}\beta}$  = 8.4 Hz,  $J_{\text{HaH}\gamma}$  = 4.8 Hz, 1 H,  $\text{CH}_{\alpha}\text{NCS}$ ), 3.80 (*s*, 3 H,  $\text{CH}_3\text{O}$ ), 3.25 (*dd*,  $J_{\text{H}\gamma\text{H}\beta}$  = 13.8 Hz,  $J_{\text{H}\gamma\text{H}\alpha}$  = 4.7 Hz, 1 H,  $\text{CH}_{\gamma}\text{Ph}$ ), 3.13 (*dd*,  $J_{\text{H}\beta\text{H}\gamma}$  = 13.8 Hz,  $J_{\text{H}\beta\text{H}\alpha}$  = 8.4 Hz, 1 H,  $\text{CH}_{\beta}\text{Ph}$ ). HRMS:  $m/z$  [ $\text{M}$ ]<sup>+</sup> calcd for  $\text{C}_{11}\text{H}_{11}\text{NO}_2\text{S}^+$  211.0510, found 221.0506.

*(S)*-Methyl 2,6-diisothiocyanatohexanoate (**11**). Colorless oil. Yield 25 % (0.122 g, 0.5 mmol).  $^1\text{H}$  NMR (700 MHz,  $\text{CDCl}_3$ ):  $\delta$  = 4.32 (2 × *d*,  $J$  = 7.8 Hz,  $J$  = 7.8 Hz, 1 H,  $\text{CHNCS}$ ), 3.83 (*s*, 3 H,  $\text{CH}_3\text{O}$ ), 3.56 (*t*,  $J$  = 6.5 Hz, 2 H,  $\text{CH}_2\text{NCS}$ ), 1.99–1.91 (*m*, 2 H,  $\text{CH}_2$ ), 1.78–1.73 (*m*, 2 H,  $\text{CH}_2$ ), 1.61–1.57 (*m*, 2 H,  $\text{CH}_2$ ). HRMS:  $m/z$  [ $\text{M}$ ]<sup>+</sup> calcd for  $\text{C}_9\text{H}_{12}\text{N}_2\text{O}_2\text{S}_2^+$  244.0343 found 244.0340.

The analytical data of ITCs **2**, **3** and **11** are in agreement with those reported previously in the literature [3].

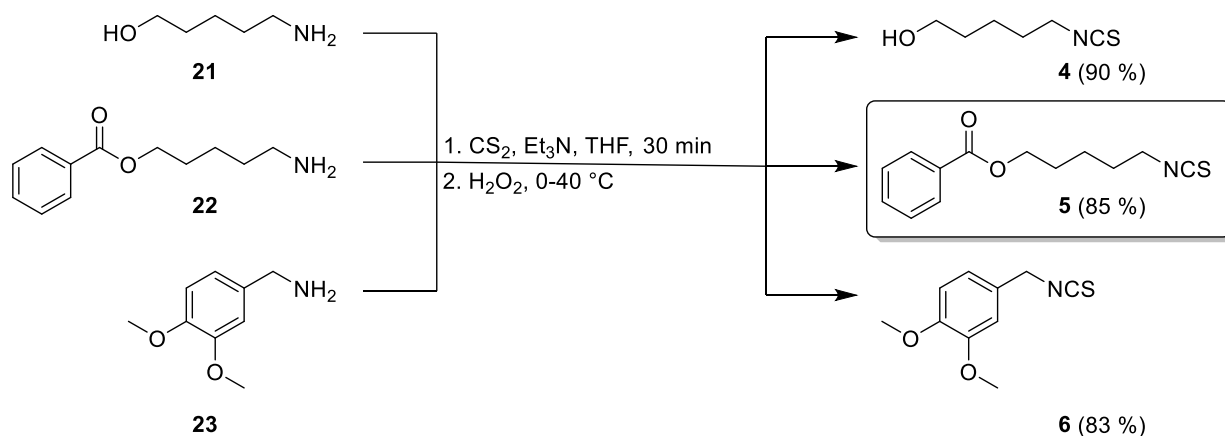

**Figure S3.** Synthesis of ITC **4-6** using  $\text{H}_2\text{O}_2$  as desulfurating reagent.

In a round-bottom flask equipped with magnetic bar primary amines **21-23** (10 mmol), *N,N*-diisopropylethylamine (10 mmol) was dissolved in THF (10 mL) and the solution was cooled in an ice bath to 0–10 °C. Next, carbon disulfide (50 mmol) was added and the reaction mixture was stirred for 30 min. After this time, 30 %  $\text{H}_2\text{O}_2$  (50 mmol) was added dropwise with temperature control and continued stirring. After 15 min, the reaction mixture was acidified with 2 M HCl to pH 1–2 and THF was evaporated under reduce pressure. The solid residue was extracted with EtOAc ( $3 \times 50$  mL), and the organic layer was dried over anhydrous  $\text{MgSO}_4$ . Pure ITCs **4-6** were isolated after flash chromatography (hexane : EtOAc 5 : 1) (**Figure S3**) [4].

**5-Isothiocyanatopentanol (4).** Colorless oil. Yield 90 % (1.3 g, 9 mmol).  $^1\text{H}$  NMR (400 MHz,  $\text{CDCl}_3$ ):  $\delta$  3.67 (t,  $J$  = 6.2 Hz, 2 H,  $\text{CH}_2\text{OH}$ ), 3.55 (t,  $J$  = 6.5 Hz, 2 H,  $\text{CH}_2\text{NCS}$ ), 1.79–1.68 (m, 3 H,  $\text{CH}_2\text{CH}_2\text{OH}$ ), 1.65–1.45 (m, 4 H,  $\text{CH}_2\text{CH}_2\text{CH}_2\text{NCS}$ ). HRMS:  $m/z$  ( $\text{M}+\text{H}$ ) $^+$  calcd for  $\text{C}_6\text{H}_{12}\text{NOS}^+$  146.0640 found 146.0777. The analytical data are in agreement with those reported previously in the literature [5]

**5-(Benzyloxy)pentyl isothiocyanate (5).** Colorless oil. Yield 85 %.  $^1\text{H}$  NMR (300 MHz,  $\text{CDCl}_3$ ):  $\delta$  8.07–8.02 (m, 2H, Ar-H), 7.59–7.53 (m, 1H, Ar-H), 7.48–7.41 (m, 2H, Ar-H), 4.34 (t,  $J$  = 6.4 Hz, 2H,  $\text{OCH}_2$ ), 3.55 (t,  $J$  = 6.4 Hz, 2H,  $\text{CH}_2\text{NCS}$ ), 1.88–1.73 (m, 4H,  $2 \times \text{CH}_2$ ), 1.66–1.54 (m, 2H,  $\text{CH}_2$ ). HRMS:  $m/z$  [ $\text{M}+\text{H}$ ] $^+$  calcd for  $\text{C}_{13}\text{H}_{16}\text{NO}_2\text{S}^+$  250.0896, found 250.0890. New compound.

**3,4-Dimethoxybenzyl isothiocyanate (6).** Colorless oil. Yield 83 % (1.73 g, 8.3 mmol).  $^1\text{H}$  NMR (400 MHz,  $\text{CDCl}_3$ ):  $\delta$  7.30–6.74 (m, 3 H,  $\text{CH}_{\text{Ar}}$ ), 4.63 (s, 2 H,  $\text{CH}_2$ ), 3.90 (s, 3 H,  $\text{CH}_3$ ), 3.88 (s, 3 H,  $\text{CH}_3$ ). HRMS:  $m/z$  ( $\text{M}+\text{H}$ ) $^+$  calcd for  $\text{C}_{10}\text{H}_{12}\text{NO}_2\text{S}^+$  210.0589 found 210.0611. The analytical data are in agreement with those reported previously in the literature [6].

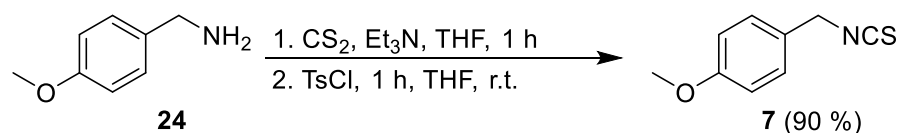

**Figure S4.** Synthesis of ITC **7** using TsCl as desulfurating agent.

Isothiocyanate **7** was also prepared in THF (10 mL), in one-pot, two-step procedure using primary amine **24** (1.1 mmol) as a substrate and in the presence of triethylamine (0.5 mL, 3.6 mmol) and CS<sub>2</sub> (0.06 mL, 1.1 mmol). In this reaction tosyl chloride (0.23 g, 1.2 mmol) was used as desulfurating reagent. Product **7** was also isolated in high yield (90 %) after flash chromatography (hexane 100%) (**Figure S4**) [7]. Known compound.

*4-Methoxybenzyl isothiocyanates (7)*. Colorless oil. Yield 90 % (0.177 g, 1 mmol). <sup>1</sup>H NMR (400 MHz, CDCl<sub>3</sub>): δ 7.24-7.23 (m, 2 H, CH<sub>Ar</sub>), 6.92-6.89 (m, 2 H, CH<sub>Ar</sub>), 4.63 (s, 2 H, CH<sub>2</sub>), 3.81 (s, 3 H, OCH<sub>3</sub>). HRMS: *m/z* (M-H)<sup>-</sup> calcd for C<sub>9</sub>H<sub>8</sub>NOS 178.0332, found: 178.0327. The analytical data are in agreement with those reported previously in the literature [8].

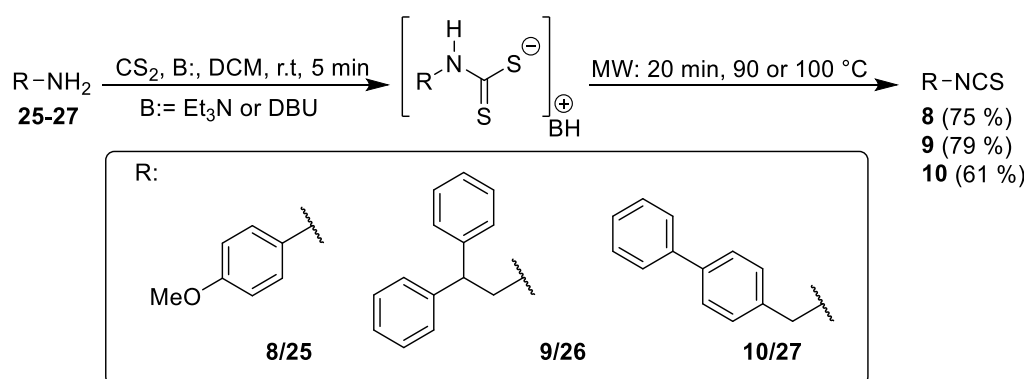

**Figure S5.** Microwave-assisted synthesis of isothiocyanates **8–10**.

Isothiocyanates **8–10** were obtained in one pot, two step microwave-assisted (MW) synthesis, without using additional desulfurating agent. Aliphatic primary amines **26–27** (2 mmol) or aromatic amine **25** (2 mmol) in the presence of carbon disulfide (CS<sub>2</sub>) (0.36 mL, 6 mmol) and triethylamine (Et<sub>3</sub>N) (for amines **26–27**, 1.11 mL, 8 mmol) or DBU (for amine **25**, 1.2 mL, 8 mmol) were transformed in standard reaction in dry DCM (2 mL) at r.t. into intermediate dithiocarbamates. Next, intermediate dithiocarbamates were converted to ITCs **8–10** in microwave reactor (20 min, 90 °C for **26–27** or 20 min, 100 °C for **25**). Final products were isolated after purification using flash chromatography (hexane 100%) in high yields (61–79 %) (**Figure S5**) [9]. Known compounds.

*1-Isothiocyanato-4-methoxybenzene (8)*. Colorless oil. Yield 75 % (0.247 g, 1.5 mmol). <sup>1</sup>H NMR (700 MHz, CDCl<sub>3</sub>): δ = 7.16 (d, *J* = 9.1 Hz, 2 H, CH<sub>Ar</sub>), 6.85 (d, *J* = 9.1 Hz, 2 H, CH<sub>Ar</sub>), 3.81 (s, 3 H, OCH<sub>3</sub>). HRMS: *m/z* (M+H)<sup>+</sup> calcd for C<sub>8</sub>H<sub>8</sub>NOS<sup>+</sup> 166.0321 found 166.0318. The analytical data are in agreement with those reported previously in the literature [9].

*(2-Isothiocyanatoethane-1,1-diyl)dibenzene (9)*. Colorless oil. Yield 79 % (0.378 g, 1.58 mmol). <sup>1</sup>H NMR (700 MHz, CDCl<sub>3</sub>): δ = 7.37–7.34 (m, 4 H, CH<sub>Ar</sub>), 7.29–7.27 (m, 2 H, CH<sub>Ar</sub>), 7.25–7.23 (m, 4 H, CH<sub>Ar</sub>), 4.38 (t, *J* = 7.5 Hz, 1 H, CH), 4.09 (d, *J* = 7.5 Hz, 2 H, CH<sub>2</sub>NCS). HRMS: *m/z* (M+H)<sup>+</sup> calcd for

$C_{15}H_{14}NS^+$  239.08 found 240.10. The analytical data are in agreement with those reported previously in the literature [9].

*4-(Isothiocyanatomethyl)-1,1'-biphenyl (10)*. White solid, mp 62–64 °C (lit.<sup>9</sup> 63–64 °C). Yield 61 % (0.274, 1.22 mmol).  $^1H$  NMR (700 MHz,  $CDCl_3$ ):  $\delta$  = 7.63–7.58 (*m*, 4 H,  $CH_{Ar}$ ), 7.47–7.44 (*m*, 2 H,  $CH_{Ar}$ ), 7.40–7.36 (*m*, 3 H,  $CH_{Ar}$ ), 4.76 (*s*, 2 H,  $CH_2$ ). HRMS:  $m/z$  ( $M$ )<sup>+</sup> calcd for  $C_{14}H_{11}NS^+$  225.0612 found 225.0613. The analytical data are in agreement with those reported previously in the literature [9].

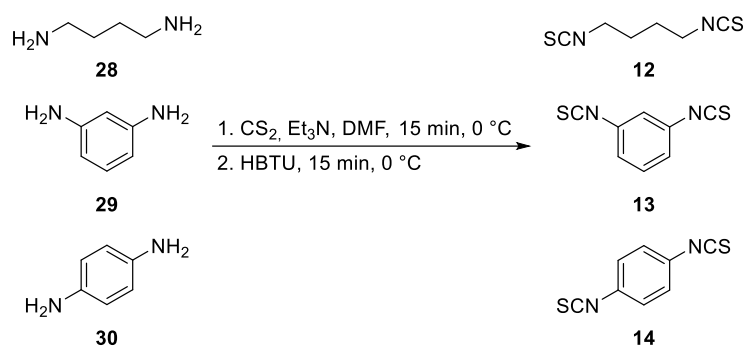

**Figure S6.** Synthesis of diisothiocyanates **12–14** using HBTU as desulfurating agent.

Diisothiocyanates **12–14** were synthesized in one-pot, two step procedure, wherein diamines **28–30** (10 mmol),  $CS_2$  (200 mmol) and  $Et_3N$  (20 mmol) were dissolved in DMF (20 mL) at 0 °C and stirred for 15 min. Subsequently, HBTU (15 mmol) was added and the reaction mixture was stirred at 0 °C for additional 15 min. Products were isolated after column chromatography using eluent EtOAc : hexane 1:1 (**Figure S6**) [10].

*1,4-Diisothiocyanatobutane (12)*. White solid, mp 125 °C (lit.<sup>11</sup> 124 °C). Yield 50 % (0.865 g).  $^1H$  NMR (700 MHz,  $CDCl_3$ ):  $\delta$  = 3.71 (*t*,  $J$  = 7.1 Hz, 4 H,  $2 \times CH_2NCS$ ), 1.80 (*m*, 4 H,  $2 \times CH_2$ ). HRMS:  $m/z$  ( $M+H$ )<sup>+</sup> calcd for  $C_6H_9N_2S_2^+$  173.0202 found 173.0200. The analytical data are in agreement with those reported previously in the literature [11].

*1,3-Diisothiocyanatobenzene (13)*. White solid, mp 52–54 °C (lit.<sup>9</sup> 50–51 °C). Yield 66 % (1.267 g).  $^1H$  NMR (700 MHz,  $CDCl_3$ ):  $\delta$  = 7.33 (*t*,  $J$  = 8.3 Hz, 1 H,  $CH_{Ar}$ ), 7.12 (*dd*,  $J$  = 8.1 Hz,  $J$  = 2.0 Hz, 2 H,  $CH_{Ar}$ ), 7.05 (*t*,  $J$  = 2.0 Hz, 1 H,  $CH_{Ar}$ ). HRMS:  $m/z$  ( $M+H$ )<sup>+</sup> calcd for  $C_8H_5N_2S_2^+$  192.9889 found 192.9885. The analytical data are in agreement with those reported previously in the literature [9].

*1,4-Diisothiocyanatobenzene (14)*. Yield 80 % (1.53 g). White solid, mp 130–131 °C (lit.<sup>12</sup> 132–133 °C).  $^1H$  NMR (700 MHz,  $CDCl_3$ )  $\delta$  7.21 (*s*, 4 H). HRMS:  $m/z$  ( $M+H$ )<sup>+</sup> calcd for  $C_8H_5N_2S_2^+$  192.9889 found 192.9891. The analytical data are in agreement with those reported previously in the literature [12].

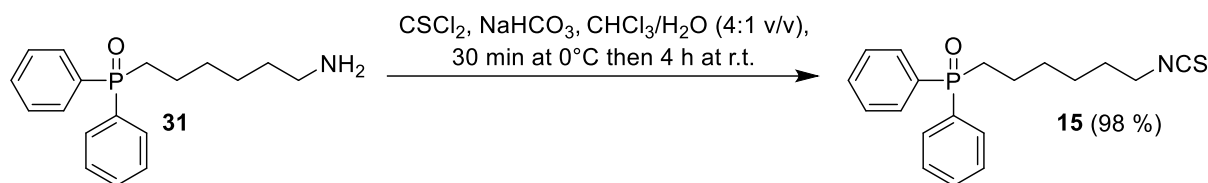

**Figure S7.** Synthesis 6-(isothiocyanatohexyl)diphenylphosphino oxide (**15**) using thiophosgene.

6-(Isothiocyanatohexyl)diphenylphosphino oxide (**15**) was synthesized using amine **31** (0.3 mmol) reaction with thiophosgene ( $\text{CSCI}_2$ ) (0.03 mL, 0.375 mmol) and  $\text{NaHCO}_3$  (0.1 g, 1.2 mmol), under two-phase chloroform-aqueous 1 M NaOH (8 mL : 2 mL) system. The reaction was stirred for 30 min at  $0^\circ\text{C}$  and 4 h at r.t. Next,  $\text{CHCl}_3$  (50 mL) was added and phases were separated. Organic phase was washed with  $\text{H}_2\text{O}$  (5 mL), 1 N HCl (5 mL),  $\text{H}_2\text{O}$  (5 mL) and brine (5 mL) and dried over anhydrous  $\text{MgSO}_4$ . Product was isolated in almost quantitative yield (98 %) after flash chromatography (hexane : acetone 2 : 1). (**Figure S7**) [13]. Known compound.

(6-Isothiocyanatohexyl)diphenylphosphine oxide (**15**). Colorless oil. Yield 98 % (0.1 g, 0.29 mmol).  $^{31}\text{P}$  NMR (283 MHz,  $\text{CDCl}_3$ ): 32.12.  $^1\text{H}$  NMR (700 MHz,  $\text{CDCl}_3$ ):  $\delta$  7.75–7.72 (4 H, *m*,  $\text{CH}_{\text{Ar}}$ ), 7.53–7.50 (2 H, *m*,  $\text{CH}_{\text{Ar}}$ ), 7.48–7.46 (4 H, *m*,  $\text{CH}_{\text{Ar}}$ ), 3.46 (2 H, *t*,  $J = 6.6$  Hz,  $\text{C}_{(6)}\text{H}_2\text{NCS}$ ), 2.28–2.24 (2 H, *m*,  $\text{CH}_2$ ), 1.67–1.62 (4 H, *m*,  $2 \times \text{CH}_2$ ), 1.46–1.37 (4 H, *m*,  $2 \times \text{CH}_2$ ). ESI-MS:  $m/z$   $[\text{M}+\text{H}]^+$  calcd for  $\text{C}_{19}\text{H}_{23}\text{NOPS}^+$  344.1232, found 344.1242. The analytical data are in agreement with those reported previously in the literature [13].

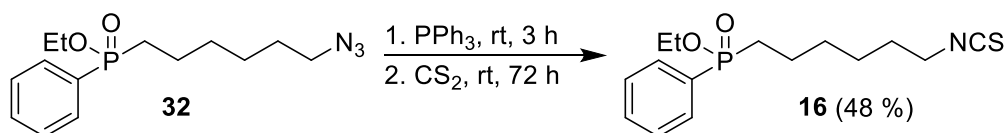

**Figure S8.** Synthesis of ITC **16** using Staudinger/aza-Wittig reaction.

Ethyl (6-isothiocyanatohexyl)(phenyl)phosphinate (**16**) was obtained in tandem Staudinger/aza-Wittig. Azide **32** (1 mmol) in reaction with triphenylphosphine ( $\text{Ph}_3\text{P}$ ) (0.289 g, 1.1 mmol) and  $\text{CS}_2$  (0.48 mL, 8 mmol) was transformed in toluene (5 mL) in good yield (48 %) to final product **16** after flash chromatography (hexane : acetone 3:1) (**Figure S8**) [13]. Known compound.

Ethyl (6-isothiocyanatohexyl)(phenyl)phosphinate (**16**). Colorless oil. Yield 48 % (0.149 g, 0.48 mmol).  $^{31}\text{P}$  NMR (283 MHz,  $\text{CDCl}_3$ ):  $\delta$  44.36.  $^1\text{H}$  NMR (700 MHz,  $\text{CDCl}_3$ ):  $\delta$  7.75–7.72 (2 H, *m*,  $\text{CH}_{\text{Ar}}$ ), 7.53–7.51 (1 H, *m*,  $\text{CH}_{\text{Ar}}$ ), 7.45 (2 H, *td*,  $J_{\text{HH}} = 7.4$  Hz,  $J_{\text{HP}} = 3.2$  Hz,  $\text{CH}_{\text{Ar}}$ ), 4.07–4.01 (1 H, *m*,  $\text{H}_\alpha$  from  $\text{CH}_2\text{O}$ ), 3.83–3.78 (1 H, *m*,  $\text{H}_\beta$  from  $\text{CH}_2\text{O}$ ), 3.43 (2 H, *t*,  $J_{\text{HH}} = 6.6$  Hz,  $\text{C}_{(6)}\text{H}_2\text{NCS}$ ), 1.93–1.86 (1 H, *m*,  $\text{H}_\alpha$  from  $\text{CH}_2$ ), 1.84–1.78 (1 H, *m*,  $\text{H}_\beta$  from  $\text{CH}_2$ ), 1.63–1.45 (4 H, *m*,  $2 \times \text{CH}_2$ ), 1.37–1.33 (4 H, *m*,  $2 \times \text{CH}_2$ ), 1.25 (3 H, *t*,  $J_{\text{HH}} = 7.0$  Hz,  $\text{CH}_3$ ). EI-HRMS:  $m/z$   $[\text{M}]^+$  calcd. for  $\text{C}_{15}\text{H}_{22}\text{NO}_2\text{PS}^+$  311.1109, found 311.1107. The analytical data are in agreement with those reported previously in the literature [13].

**BITC** and **PEITC** were synthesized, in yield 82 % and 87 % yields, respectively, according to the procedure shown in **Figure S5** [7] in the presence of Et<sub>3</sub>N. **AITC** has been synthesized in one-pot, two step procedure using propane phosphonic acid anhydride (T3P®) as desulfurating agent [14]. **SFN** was commercially available (Sigma-Aldrich, Poland)



**Table S1.** Molecular docking scores obtained for best models of all tested compounds, divided based on binding cavity occupied by the ligand, and visualization of docking pose for best scoring models.

| 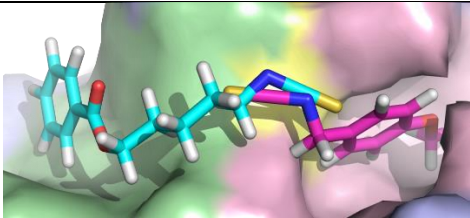 |                                  |                                  |                                                                                      |
|-----------------------------------------------------------------------------------|----------------------------------|----------------------------------|--------------------------------------------------------------------------------------|
| Compound                                                                          | Docking scores<br>(large cavity) | Docking scores<br>(small cavity) | Best scoring docking model                                                           |
| BITC                                                                              |                                  | -55.5377                         |    |
| PEITC                                                                             |                                  | -59.3983                         |  |
| SFN                                                                               |                                  | -50.1264                         |  |
| AITC                                                                              |                                  | -60.6461                         |  |

|   |          |                                                                                      |
|---|----------|--------------------------------------------------------------------------------------|
| 1 | -45.472  | 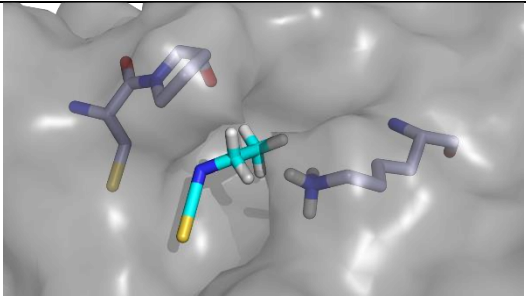   |
| 2 | -56.5898 |    |
| 3 | -64.9994 |   |
| 4 | -63.6047 |  |
| 5 | -77.618  |  |

|    |          |                                                                                      |
|----|----------|--------------------------------------------------------------------------------------|
| 6  | -62.8034 | 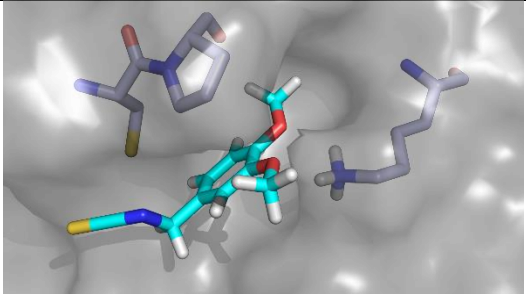   |
| 7  | -59.9651 |    |
| 8  | -55.1661 |   |
| 9  | -65.6743 |  |
| 10 | -70.3154 |  |

|    |          |                                                                                      |
|----|----------|--------------------------------------------------------------------------------------|
| 11 | -68.4147 | 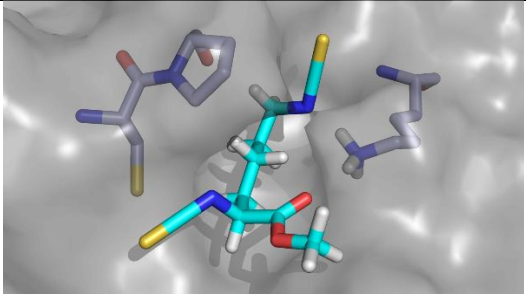   |
| 12 | -60.8435 |    |
| 13 | -54.9529 |   |
| 14 | -56.5582 |  |
| 15 | -73.1809 |  |

---

16

-77.7917

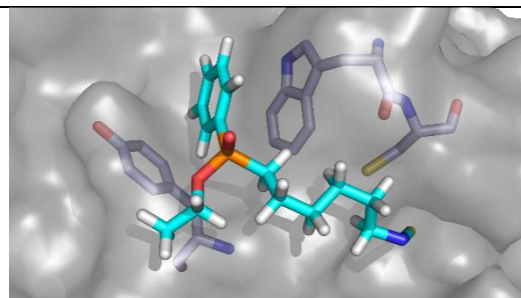

### 3. References

- [1]. Nam, K. D.; Han, M.; Yoon, J.; Kim, E.-A.; Cho, S.-W.; Hahn, H.-G. 2-Amino-1,3-thiazoles Suppressed Lipopolysaccharide-Induced IL- $\beta$  and TNF- $\alpha$ . *Bull. Korean Chem. Soc.* **2013**, *34*, 271
- [2]. Li, D.; Shu, Y.; Li, P.; Zhang, W.; Ni, H.; Cao, Y. Synthesis and structure-activity relationships of aliphatic isothiocyanate analogs as antibiotic agents. *Med. Chem. Res.* **2013**, *22*, 3119–3125.
- [3]. Janczewski, Ł.; Kręgiel, D.; Kolesińska, B. Synthesis of Isothiocyanates Using DMT/NMM/TsO<sup>−</sup> as a New Desulfurization Reagent. *Molecules* **2021**, *26*, 2740.
- [4]. Li, G.; Tajima, H.; Ohtani, T. An Improved Procedure for the Preparation of Isothiocyanates from Primary Amines by Using Hydrogen Peroxide as the Dehydrosulfurization Reagent. *J. Org. Chem.* **1997**, *62*, 4539–4540.
- [5]. Park, S.; Hayes, B. L.; Marankan, F.; Mulhearn, D. C.; Wanna, L.; Mesecar, A. D.; Santarsiero, B. D.; Johnson, M. E.; Venton, D. L. Regioselective covalent modification of hemoglobin in search of antisickling agents. *J. Med. Chem.* **2003**, *46*, 936–953.
- [6]. De Nicola, G. R.; Montaut, S.; Rollin, P.; Nyegue, M.; Menut, C.; Iori, R.; Tatibouët, A. Stability of benzylic-type isothiocyanates in hydrodistillation-mimicking conditions. *J. Agric. Food Chem.* **2013**, *61*, 137–142.
- [7]. Wong, R.; Dolmann, S. J. Isothiocyanates from Tosyl Chloride Mediated Decomposition of in Situ Generated Dithiocarbamic Acid Salts. *J. Org. Chem.* **2007**, *72*, 3969–3971.
- [8]. Kiaku, C.; Walsh, Leech, M. C.; Poole, D. L.; Mason, J.; Goodall, I. C. A.; Devo, P.; Lam, K. Electrochemical isothiocyanation of primary amines. *Org. Lett.* **2023**, *25*, 1147–1150.
- [9]. Janczewski, Ł.; Gajda, A.; Gajda, T. Direct, Microwave-Assisted Synthesis of Isothiocyanates. *Eur. J. Org. Chem.* **2019**, *2019*, 2528–2532.
- [10]. Grzywa, R.; Winiarski, Ł.; Psurski, M.; Rudnicka, A.; Wietrzyk, J.; Gajda, T.; Oleksyszyn, J. Synthesis and biological activity of diisothiocyanate-derived mercapturic acids. *Bioorg. Med. Chem. Lett.* **2016**, *26*, 667–671.
- [11]. Tournaire-Arellano, C.; Younes-El Hage, S.; Valès, P.; Caujolle, R.; Sanon, A.; Bories, C.; Loiseau, P. M. Synthesis and biological evaluation of ureido and thioureido derivatives of 2-amino-2-deoxy-d-glucose and related aminoalcohols as *N*-acetyl- $\beta$ -d-hexosaminidase inhibitors. *Carbohydr. Res.* **1998**, *314*, 47–63.
- [12]. Liao, Y. –Y.; Deng, J. –C.; Ke, Y. –P.; Zhong, X. –L.; Xu, L.; Tang, R. –Y.; Zheng, W. Isothiocyanation of amines using the Langlois reagent. *Chem. Commun.* **2017**, *53*, 6073–6076.
- [13]. Janczewski, Ł.; Psurski, M.; Świtalska, M.; Gajda, A.; Goszczyński, T.M.; Oleksyszyn, J.; Wietrzyk, J.; Gajda, T. Design, Synthesis, and Evaluation of  $\omega$ -(Isothiocyanato)alkylphosphinates and Phosphine Oxides as Antiproliferative Agents. *ChemMedChem* **2018**, *13*, 105–115.
- [14]. Janczewski, Ł.; Gajda, A.; Frankowski, S.; Goszczyński, T.M.; Gajda, T. T3P<sup>®</sup> – A Benign Desulfurating Reagent in the Synthesis of Isothiocyanates. *Synthesis (Stuttg.)* **2018**, *50*, 1141–1151.
